# Supplementary material
Source: HighWire-hosted journal article supplement (http://www.jrheum.org/highwire/filestream/36933/field_highwire_adjunct_files/0/190302DataSuppl_ethics.pdf)
Supplement: 190302DataSuppl_ethics.pdf [file 190302DataSuppl_ethics.pdf]

## ONLINE SUPPLEMENTARY DATA

### Ethics approval and consent to participate

All patients included in this study provided written informed consent. The study was approved by the following local medical ethical committees:

| Investigator                      | Ethics Board                                                                                              | Approval/Reference No.                                                                                                         |
|-----------------------------------|-----------------------------------------------------------------------------------------------------------|--------------------------------------------------------------------------------------------------------------------------------|
| Cheryl Barnabe                    | University of Calgary Conjoint Health Research Ethics Board                                               | Ethics ID: E-24487                                                                                                             |
| Gilles Boire                      | Comité d'éthique de la recherche en santé chez l'humain du Centre hospitalier universitaire de Sherbrooke | Pour le projet # 11-069                                                                                                        |
| Carol Hitchon                     | University of Manitoba Bannatyne Campus Health Research Ethics Board                                      | Ref No: H2011:177                                                                                                              |
| Joanne Homik                      | University of Alberta Health Research Ethics Board                                                        | Pro00020927                                                                                                                    |
| Maggie Larché                     | Hamilton Integrated Research Ethics Board                                                                 | Project # 12-3691                                                                                                              |
| Proton Rahman                     | Health Research Ethics Authority of Newfoundland & Labrador                                               | Ref # 11.351                                                                                                                   |
| Saeed Shaikh                      | Institutional Review Board Services                                                                       | N/A                                                                                                                            |
| Carter Thorne                     | Southlake Regional Health Centre Research Ethics Board                                                    | SRHC# 0020-1112                                                                                                                |
| Mikkel Østergaard                 | De Videnskabsetiske Komiteer i Region Hovedstaden                                                         | H-4-2011-085                                                                                                                   |
| Bernard Combe (National Approval) | Comité de Protection des Personnes Sud-Méditerranée IV                                                    | National PI<br>Réf # 11 08 03;<br>N° ID-RCB: 2011-A00883-38;<br>Réf Promoteur UF 8783 (RA BIODAM);<br>Réf. AFSSAPS: B111182-40 |
| Alain Cantagrel                   | Comité de Protection des Personnes Sud-Méditerranée IV                                                    | Réf # 11 08 03;<br>N° ID-RCB: 2011-A00883-38;<br>Réf Promoteur UF 8783 (RA BIODAM);<br>Réf. AFSSAPS: B111182-40                |
| Maxime Dougados                   | Comité de Protection des Personnes Sud-Méditerranée IV                                                    | Réf # 11 08 03;<br>N° ID-RCB: 2011-A00883-38;<br>Réf Promoteur UF 8783 (RA BIODAM);<br>Réf. AFSSAPS: B111182-40                |

|                                    |                                                                                                                                               |                                                                                                                  |
|------------------------------------|-----------------------------------------------------------------------------------------------------------------------------------------------|------------------------------------------------------------------------------------------------------------------|
| René-Marc Flipo                    | Comité de Protection des Personnes Sud-Méditerranée IV                                                                                        | Réf # 11 08 03;<br>N° ID-RCB: 2011-A00883-38 ;<br>Réf Promoteur UF 8783 (RA BIODAM);<br>Réf. AFSSAPS: B111182-40 |
| Alain Saraux                       | Comité de Protection des Personnes Sud-Méditerranée IV                                                                                        | Réf # 11 08 03;<br>N° ID-RCB: 2011-A00883-38;<br>Réf Promoteur UF 8783 (RA BIODAM);<br>Réf. AFSSAPS: B111182-40  |
| Thierry Schaeverbeke               | Comité de Protection des Personnes Sud-Méditerranée IV                                                                                        | Réf # 11 08 03;<br>N° ID-RCB: 2011-A00883-38;<br>Réf Promoteur UF 8783 (RA BIODAM);<br>Réf. AFSSAPS: B111182-40  |
| Marina Backhaus/<br>Gerd Burmester | Ethikausschuss 1 am Campus Charité - Mitte                                                                                                    | Application No: EA1/255/11                                                                                       |
| Thomas Neumann                     | Universitätsklinikum Jena Ethik-Kommission                                                                                                    | Bearbeitungs Nr: 3466-06/12                                                                                      |
| Wolfgang Spieler                   | Die Ethikkommission der Ärztekammer Sachsen-Anhalt                                                                                            | 23/12                                                                                                            |
| Ingo Tarner                        | Ethik-Kommission am Fachbereich Medizin Justus -Liebig Universität Giessen                                                                    | AZ: 40/12                                                                                                        |
| Oliver FitzGerald                  | St. Vincent's Healthcare Group Limited Ethics and Medical Research Committee                                                                  | N/A                                                                                                              |
| Ori Elkayam                        | Tel Aviv Sourasky Medical Center Institutional Review Board (Helsinki Committee)                                                              | 0146-11-TLV                                                                                                      |
| Gianfranco Ferraccioli             | Università Cattolica Del Sacro Cuore Facoltà di Medicina E Chirurgia "Agostino Gemelli" Comitato Etico                                        | Prot If (A.1135)/C.E./2011;<br>p/797/CE 2011                                                                     |
| Maurizio Rossini                   | Azienda Ospedaliera Universitaria Integrata Verona Dipartimento Direzione Medica Ospedaliera e Farmacia Comitato Etico Per La Sperimentazione | Sperimentazione n. prog. CE 2156                                                                                 |
| Leonardo Punzi                     | Regione Veneto Azienda Ospedaliera di Padova Comitato Etico per la Sperimentazione                                                            | Prot. N. 2554P                                                                                                   |
| Marcello Govoni                    | Comitato Etico Della Provincia Di Ferrara                                                                                                     | Protocollo n. 118-2011                                                                                           |
| Piercarlo Sarzi-Puttini            | Ospedale Luigi Sacco, Azienda Ospedaliera - Polo Universitario, Comitato Etico Locale ET/nb                                                   | Prot. N. 272/2012/20/AP                                                                                          |
| Luigi Sinigaglia                   | Azienda Ospedaliera, Istituto Ortopedico Gaetano Pini, Comitato Etico                                                                         | 4/2011                                                                                                           |

|                           |                                                                                                                                                   |                                                                      |
|---------------------------|---------------------------------------------------------------------------------------------------------------------------------------------------|----------------------------------------------------------------------|
| Robert Landewé            | Medisch Ethische ToetsingsCommissie van Zuyderland én van Zuyd Hogeschool                                                                         | Ref: MECT 11-T-98;<br>Ref: NL38200.096.11                            |
| Renée Allaart             | Leids Universitair Medisch Centrum<br>Commissie Medische Ethiek                                                                                   | Ref: METC 11-T-98;<br>Ref: NL38200.096.11;<br>Ref: P12.049/SH/sh     |
| Paul-Peter Tak            | Medisch Ethische Commissie, Academisch Medisch Centrum Universiteit van Amsterdam                                                                 | METC 12-015                                                          |
| Dirkjan van Schaardenburg | Leids Universitair Medisch Centrum,<br>Commissie Medische Ethiek,<br>Medisch Ethische Eoetsingscommissie, voor het Slotervaartziekenhuis en Reade | Ref: MECT 11-T-98;<br>Ref: NL38200.096.11;<br>Nummer: U/12.014/P1204 |
| Hilde Berner Hammer       | REK Regionale Komiteer for Medisinsk Og Helsefaglig Forskningsetikk                                                                               | Ref: 2011/1338                                                       |
| Clifton Bingham           | Johns Hopkins Medicine Institutional Review Boards                                                                                                | Study #: NA_00052505                                                 |
| Philip Mease              | Western Institutional Review Board (WIRB)                                                                                                         | Study Num: 1128284;<br>WIRB Pro Num: 20111712                        |
| Joan Bathon               | Columbia University Medical Center<br>Institutional Review Board                                                                                  | Protocol Number: IRB-<br>AAAI4651                                    |
| Christopher Ritchlin      | University of Rochester Research Subjects Review Board                                                                                            | RSRB: RSRB00039665                                                   |
| Vivian Bykerk             | Institutional Review Board of the Hospital for Special Surgery                                                                                    | 2014-228-CR2                                                         |

N/A An ethics approval number is not provided by these ethics committees
